# Supplementary material for: Genomic Sub-Classification of Ovarian Clear Cell Carcinoma Revealed by Distinct Mutational Signatures
Source: MDPI journal article supplement (doi:10.3390/cancers13205242), 2021-10-19
Supplement: s1 [file s1]

## Supplementary Materials

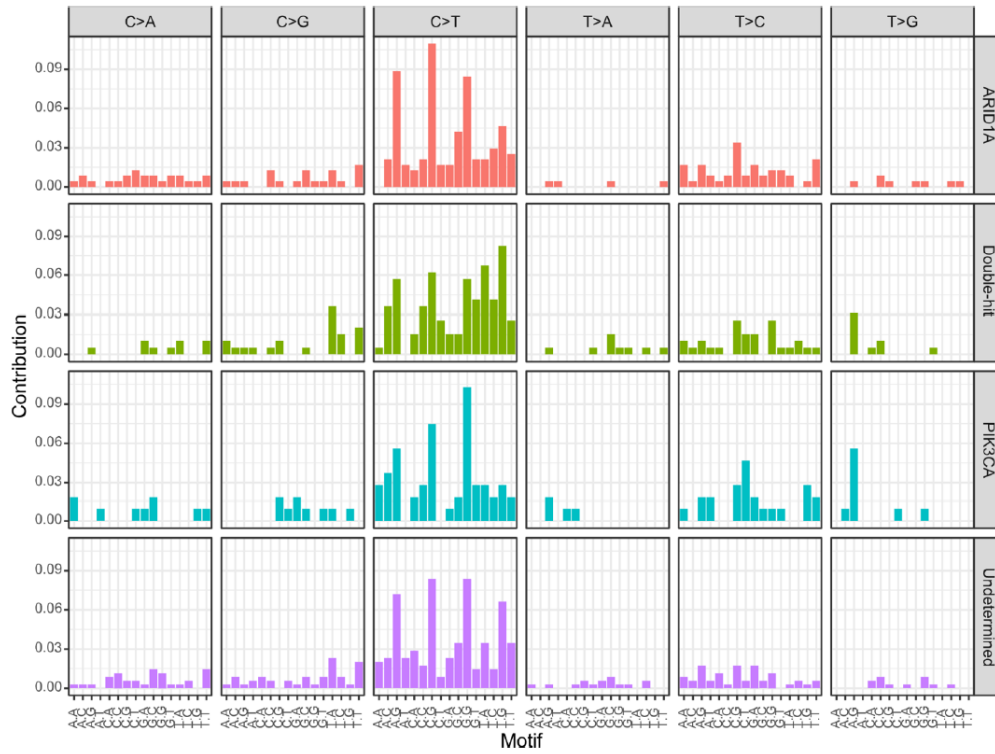

**Figure S1.** Mutational signatures among the four molecular subgroups.

**Table S1.** Significant interaction events (co-occurrence or mutually exclusive) among genes.

| Gene A          | Gene B         | P-value | Odds ratio | Type of event      | Event ratio |
|-----------------|----------------|---------|------------|--------------------|-------------|
| <i>ADAMTS20</i> | <i>PDE4DIP</i> | 0.0025  | 20.46      | Co_Occurence       | 4/6         |
| <i>SYNE1</i>    | <i>PIK3CA</i>  | 0.0034  | 0.00       | Mutually_Exclusive | 0/33        |
| <i>KMT2C</i>    | <i>MYH9</i>    | 0.0044  | 16.34      | Co_Occurence       | 4/7         |
| <i>ARID1A</i>   | <i>PKHD1</i>   | 0.0052  | 0.00       | Mutually_Exclusive | 0/34        |
| <i>ATM</i>      | <i>KMT2C</i>   | 0.0094  | 10.88      | Co_Occurence       | 4/8         |
| <i>TAF1L</i>    | <i>KMT2C</i>   | 0.0094  | 10.88      | Co_Occurence       | 4/8         |
| <i>CYP2D6</i>   | <i>PBRM1</i>   | 0.0112  | 15.84      | Co_Occurence       | 3/6         |
| <i>TRRAP</i>    | <i>RECQL4</i>  | 0.0126  | 14.14      | Co_Occurence       | 3/6         |
| <i>EP400</i>    | <i>SYNE1</i>   | 0.0149  | 8.96       | Co_Occurence       | 4/9         |
| <i>MYH9</i>     | <i>TAF1L</i>   | 0.0212  | 10.60      | Co_Occurence       | 3/7         |
| <i>KMT2D</i>    | <i>PIK3CA</i>  | 0.0244  | 6.54       | Co_Occurence       | 7/18        |
| <i>TRRAP</i>    | <i>PDE4DIP</i> | 0.0323  | 8.42       | Co_Occurence       | 3/8         |
| <i>PPP2R1A</i>  | <i>PKHD1</i>   | 0.0323  | 8.42       | Co_Occurence       | 3/8         |
| <i>ATM</i>      | <i>PIK3CA</i>  | 0.0338  | 0.00       | Mutually_Exclusive | 0/30        |
| <i>PIK3CG</i>   | <i>CSMD3</i>   | 0.0463  | 6.93       | Co_Occurence       | 3/9         |
| <i>PRKDC</i>    | <i>RNF213</i>  | 0.0463  | 6.93       | Co_Occurence       | 3/9         |

**Table S2.** Adjusted p-values from multiple comparisons between nucleotide changes among the molecular subgroups.

|            |       | ARID1A           | Double-hit     | PIK3CA        | Undetermined    |
|------------|-------|------------------|----------------|---------------|-----------------|
|            |       | adjusted p-value |                |               |                 |
| CA changes | CA/CG | 0.93             | 1              | 0.72          | 0.84            |
|            | CA/CT | <b>0.002</b>     | <b>0.012</b>   | <b>0.01</b>   | <b>3.00E-05</b> |
|            | CA/TA | 0.93             | 1              | 0.72          | 0.84            |
|            | CA/TC | 0.47             | 1              | 0.72          | 0.14            |
|            | CA/TG | 0.34             | 1              | 0.49          | 0.84            |
| CG changes | CG/CA | 1                | 1              | 1             | 0.56            |
|            | CG/CT | <b>0.0022</b>    | <b>0.0076</b>  | <b>0.016</b>  | <b>0.00019</b>  |
|            | CG/TA | 1                | 1              | 1             | 0.17            |
|            | CG/TC | 0.46             | 1              | 0.78          | 0.56            |
|            | CG/TG | 0.46             | 0.95           | 1             | 0.26            |
| CT changes | CT/CA | <b>0.002</b>     | <b>0.003</b>   | <b>0.0083</b> | <b>3.00E-05</b> |
|            | CT/CG | <b>0.002</b>     | <b>0.003</b>   | <b>0.0096</b> | <b>0.00012</b>  |
|            | CT/TA | <b>0.023</b>     | <b>0.002</b>   | <b>0.01</b>   | <b>4.20E-05</b> |
|            | CT/TC | <b>0.018</b>     | <b>0.00078</b> | <b>0.01</b>   | <b>0.00017</b>  |
|            | CT/TG | <b>0.0024</b>    | <b>0.00078</b> | <b>0.0016</b> | <b>0.00017</b>  |
| TA changes | TA/CA | 1                | 1              | 0.72          | 0.93            |
|            | TA/CG | 1                | 1              | 1             | 0.13            |
|            | TA/CT | 0.11             | <b>0.0034</b>  | <b>0.026</b>  | <b>5.20E-05</b> |
|            | TA/TC | 0.66             | 0.8            | 0.3           | <b>0.0033</b>   |
|            | TA/TG | 1                | 1              | 1             | 0.93            |
| TC changes | TC/CA | 0.38             | 0.7            | 0.39          | 0.068           |
|            | TC/CG | 0.38             | 0.82           | 0.39          | 0.31            |
|            | TC/CT | <b>0.045</b>     | <b>0.00098</b> | <b>0.041</b>  | <b>0.00047</b>  |
|            | TC/TA | 0.38             | 0.6            | 0.23          | <b>0.0033</b>   |
|            | TC/TG | 0.069            | 0.17           | 0.081         | <b>0.028</b>    |
| TG changes | TG/CA | 0.26             | 0.79           | 0.37          | 0.64            |
|            | TG/CG | 0.26             | 0.71           | 1             | 0.26            |
|            | TG/CT | <b>0.004</b>     | <b>0.00078</b> | <b>0.0016</b> | <b>0.00042</b>  |
|            | TG/TA | 0.62             | 0.79           | 1             | 0.74            |
|            | TG/TC | 0.069            | 0.17           | 0.081         | <b>0.037</b>    |
